# Supplementary material for: Restriction digest screening facilitates efficient detection of site-directed mutations introduced by CRISPR in C. albicans UME6
Source: PeerJ. 2018 Jun 6;6:e4920. doi: 10.7717/peerj.4920 (PMC5994162; doi:10.7717/peerj.4920)
Supplement: Data S1 — Raw data for larval death rate experiment in 2C. [file peerj-06-4920-s001.xlsx]

## Sheet: Sheet1
Time (h)	PBS_1	PBS_2	PBS_3	PBS_4	PBS_5	wt_1	wt_2	wt_3	wt_4	wt_5	UME6stopTAA_1	UME6stopTAA_2	UME6stopTAA_3	UME6stopTAA_4	UME6stopTAA_5	UME6EE_1	UME6EE_2	UME6EE_3	UME6EE_4	UME6EE_5
24	10	10	10	10	10	9	10	9	10	9	9	10	10	9	10	9	10	10	10	10
48	10	10	10	10	10	8	8	7	8	9	9	10	9	7	10	8	10	8	9	10
72	10	10	10	10	10	6	8	7	8	8	9	10	9	6	10	6	9	7	7	7
96	10	10	10	10	10	4	6	4	6	7	8	9	9	6	9	6	8	7	7	5
120	10	10	10	9	10	3	5	2	5	6	8	9	9	6	9	4	7	6	7	4
144	10	10	10	9	10	3	4	2	3	5	7	9	9	5	9	4	7	6	7	3
168	10	10	10	8	9	3	3	1	2	3	6	8	9	5	8	4	6	5	5	3
	(# larvae out of 10 remaining alive)
				47

## Sheet: Sheet2
Time (h)	Treatment	Status
168	PBS_1	0		Data are identical to that in sheet 1. In sheet1 data are presented in treatment group, whereas sheet2 shows data for each individual larvae
168	PBS_1	0		Larvae were kept in study for 7 days (168 hours) or until they died, whichever came first
168	PBS_1	0		Status: 0 indicates larvae remained alive, 1 indicates death
168	PBS_1	0
168	PBS_1	0
168	PBS_1	0
168	PBS_1	0
168	PBS_1	0
168	PBS_1	0
168	PBS_1	0
168	PBS_2	0
168	PBS_2	0
168	PBS_2	0
168	PBS_2	0
168	PBS_2	0
168	PBS_2	0
168	PBS_2	0
168	PBS_2	0
168	PBS_2	0
168	PBS_2	0
168	PBS_3	0
168	PBS_3	0
168	PBS_3	0
168	PBS_3	0
168	PBS_3	0
168	PBS_3	0
168	PBS_3	0
168	PBS_3	0
168	PBS_3	0
168	PBS_3	0
168	PBS_4	0
168	PBS_4	0
168	PBS_4	0
168	PBS_4	0
168	PBS_4	0
168	PBS_4	0
168	PBS_4	0
168	PBS_4	0
168	PBS_4	0
144	PBS_4	1
168	PBS_5	0
168	PBS_5	0
168	PBS_5	0
168	PBS_5	0
168	PBS_5	0
168	PBS_5	0
168	PBS_5	0
168	PBS_5	0
120	PBS_5	1
168	PBS_5	1
24	wt_1	1
48	wt_1	1
72	wt_1	1
72	wt_1	1
96	wt_1	1
96	wt_1	1
120	wt_1	1
168	wt_1	0
168	wt_1	0
168	wt_1	0
48	wt_2	1
48	wt_2	1
96	wt_2	1
96	wt_2	1
120	wt_2	1
144	wt_2	1
168	wt_2	1
168	wt_2	0
168	wt_2	0
168	wt_2	0
24	wt_3	1
48	wt_3	1
48	wt_3	1
96	wt_3	1
96	wt_3	1
96	wt_3	1
120	wt_3	1
120	wt_3	1
168	wt_3	1
168	wt_3	0
48	wt_4	1
48	wt_4	1
96	wt_4	1
96	wt_4	1
120	wt_4	1
144	wt_4	1
144	wt_4	1
168	wt_4	1
168	wt_4	0
168	wt_4	0
24	wt_5	1
72	wt_5	1
96	wt_5	1
120	wt_5	1
144	wt_5	1
168	wt_5	1
168	wt_5	1
168	wt_5	0
168	wt_5	0
168	wt_5	0
24	UME6stopTAA_1	1
96	UME6stopTAA_1	1
144	UME6stopTAA_1	1
168	UME6stopTAA_1	1
168	UME6stopTAA_1	0
168	UME6stopTAA_1	0
168	UME6stopTAA_1	0
168	UME6stopTAA_1	0
168	UME6stopTAA_1	0
168	UME6stopTAA_1	0
96	UME6stopTAA_2	1
168	UME6stopTAA_2	1
168	UME6stopTAA_2	0
168	UME6stopTAA_2	0
168	UME6stopTAA_2	0
168	UME6stopTAA_2	0
168	UME6stopTAA_2	0
168	UME6stopTAA_2	0
168	UME6stopTAA_2	0
168	UME6stopTAA_2	0
48	UME6stopTAA_3	1
168	UME6stopTAA_3	0
168	UME6stopTAA_3	0
168	UME6stopTAA_3	0
168	UME6stopTAA_3	0
168	UME6stopTAA_3	0
168	UME6stopTAA_3	0
168	UME6stopTAA_3	0
168	UME6stopTAA_3	0
168	UME6stopTAA_3	0
24	UME6stopTAA_4	1
48	UME6stopTAA_4	1
48	UME6stopTAA_4	1
72	UME6stopTAA_4	1
144	UME6stopTAA_4	1
168	UME6stopTAA_4	0
168	UME6stopTAA_4	0
168	UME6stopTAA_4	0
168	UME6stopTAA_4	0
168	UME6stopTAA_4	0
96	UME6stopTAA_5	1
168	UME6stopTAA_5	1
168	UME6stopTAA_5	0
168	UME6stopTAA_5	0
168	UME6stopTAA_5	0
168	UME6stopTAA_5	0
168	UME6stopTAA_5	0
168	UME6stopTAA_5	0
168	UME6stopTAA_5	0
168	UME6stopTAA_5	0
24	UME6EE_1	1
48	UME6EE_1	1
72	UME6EE_1	1
72	UME6EE_1	1
120	UME6EE_1	1
120	UME6EE_1	1
168	UME6EE_1	0
168	UME6EE_1	0
168	UME6EE_1	0
168	UME6EE_1	0
72	UME6EE_2	1
96	UME6EE_2	1
120	UME6EE_2	1
168	UME6EE_2	1
168	UME6EE_2	0
168	UME6EE_2	0
168	UME6EE_2	0
168	UME6EE_2	0
168	UME6EE_2	0
168	UME6EE_2	0
48	UME6EE_3	1
48	UME6EE_3	1
72	UME6EE_3	1
120	UME6EE_3	1
168	UME6EE_3	1
168	UME6EE_3	0
168	UME6EE_3	0
168	UME6EE_3	0
168	UME6EE_3	0
168	UME6EE_3	0
48	UME6EE_4	1
72	UME6EE_4	1
72	UME6EE_4	1
168	UME6EE_4	1
168	UME6EE_4	1
168	UME6EE_4	0
168	UME6EE_4	0
168	UME6EE_4	0
168	UME6EE_4	0
168	UME6EE_4	0
72	UME6EE_5	1
72	UME6EE_5	1
72	UME6EE_5	1
96	UME6EE_5	1
96	UME6EE_5	1
120	UME6EE_5	1
144	UME6EE_5	1
168	UME6EE_5	0
168	UME6EE_5	0
168	UME6EE_5	0
